# Supplementary material for: Characterization of an Endolysin Targeting Clostridioides difficile That Affects Spore Outgrowth
Source: MDPI journal article supplement (doi:10.3390/ijms22115690), 2021-05-26
Supplement: s1 [file s1]

Supplementary Table 1: Primers used for PCR amplification of different construct of CWH

| Primers    | <sup>a</sup> Sequences (5'–3')               |
|------------|----------------------------------------------|
| CWH_Glu_F  | AAC <u>GGATCC</u> <b>AT</b> GAACGGTCCGGCGCAA |
| CWH_Glu_R  | CGC <u>AAGCTT</u> <b>TT</b> AGATCTGCTTGTAGAA |
| CWH_Nlpc_F | AAC <u>GGATCC</u> <b>AT</b> GAACAACAAAGTGAGC |
| CWH_Nlpc_R | CGC <u>AAGCTT</u> <b>TT</b> AAAAGAAACGACGCGC |
| CWH_CBD_F  | CG <u>GGATCC</u> <b>GAT</b> GCTGAGCGACGATCTG |
| CWH_CBD_R  | CGC <u>AAGCTT</u> <b>TT</b> ACTGCTTCTCGTTTTT |

<sup>a</sup>Restriction sites are indicated by underlining. Start and stop codons are indicated by bold letters
