# Supplementary material for: Characterization of an Endolysin Targeting Clostridioides difficile That Affects Spore Outgrowth
Source: MDPI journal article supplement (doi:10.3390/ijms22115690), 2021-05-26

(A)  
PROCHECK

# Ramachandran Plot

saves

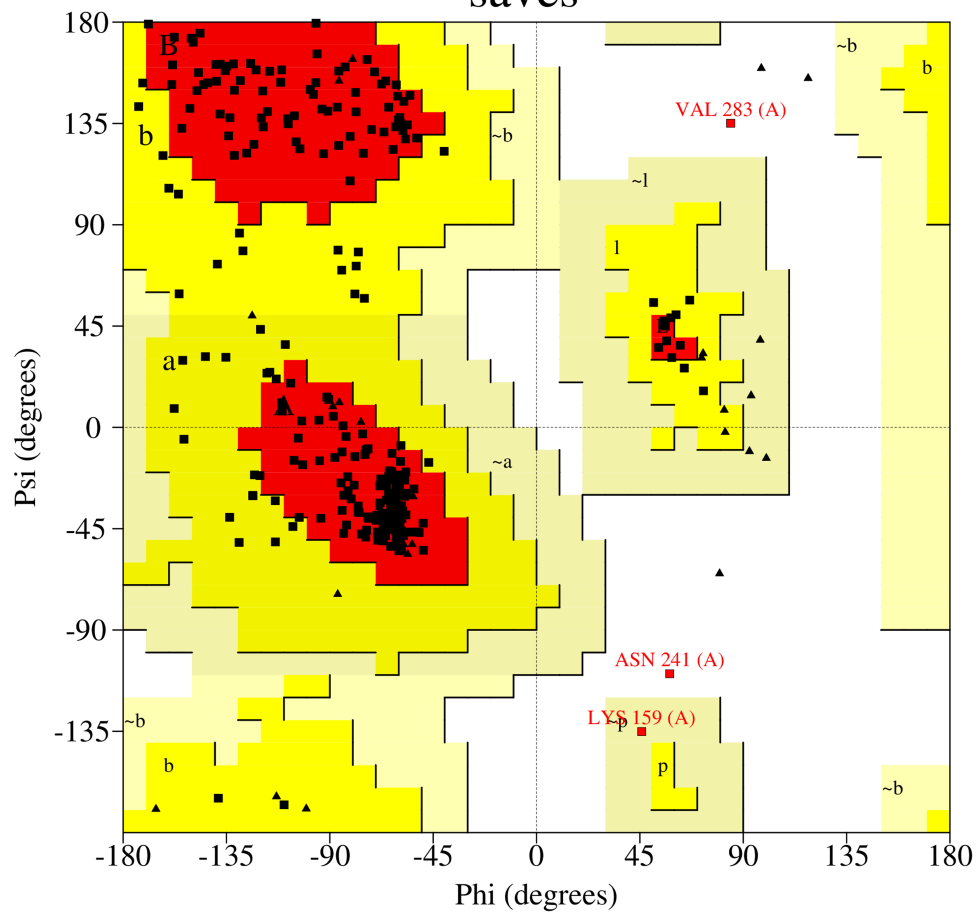

(B)

Program: ERRAT2  
File: endolysin model.pdb  
Chain#:A  
Overall quality factor\*\*: 94.966

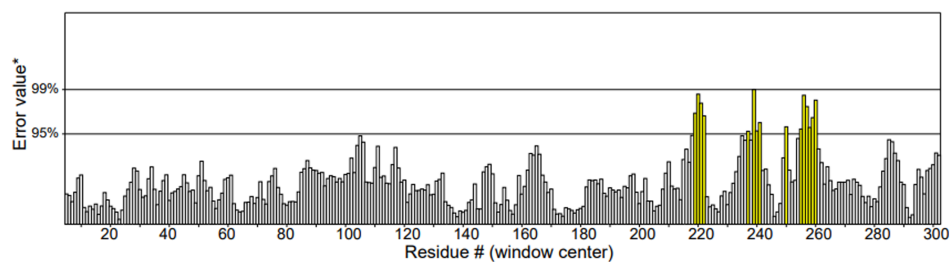

Supplement: s1 [file s1]
